# Supplementary material for: Preparation of citric acid-modified poly(vinyl alcohol) films for effectively precipitating calcium phosphate particles
Source: Royal Society of Chemistry journal article supplement (doi:10.1039/d2ce00800a), 2022-01-01
Supplement: d2ce00800a1.pdf [file d2ce00800a1.pdf]

## ***Electronic Supplementary Information***

### **Preparation of Citric Acid-Modified Poly(vinyl alcohol) Films for Effectively Precipitating Calcium Phosphate Particles**

Yanni Zhou<sup>a</sup>, Yadong Chai<sup>a,b</sup>, Mari Miyata<sup>c</sup>, Motohiro Tagaya<sup>a,\*</sup>

<sup>a</sup> *Department of Materials Science and Technology, Nagaoka University of Technology,  
Kamitomioka 1603-1, Nagaoka, Niigata 940-2188, Japan.*

<sup>b</sup> *Research Fellow of the Japan Society for the Promotion of Science (DC),  
5-3-1 Koji-machi, Chiyoda-ku, Tokyo 102-0083, Japan.*

<sup>c</sup> *Department of Materials Engineering, National Institute of Technology, Nagaoka College,  
Nishikatakai 888, Nagaoka, Niigata 940-8532, Japan.*

**\* Author to whom correspondence should be addressed:**

Tel: +81-258-47-9345; Fax: +81-258-47-9300, E-mail: tagaya@mst.nagaokaut.ac.jp

**Scheme S1**

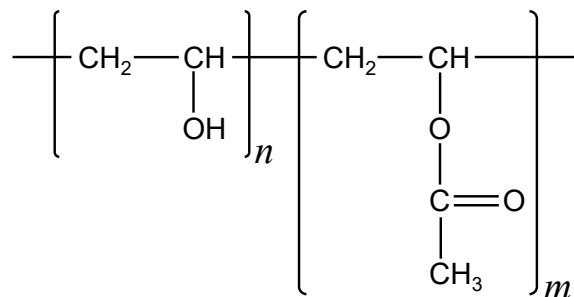

**Scheme S1.** Illustration of the chemical structure of PVA used in this study, where the averaged polymerization degree ( $n+m$ ): 900~1000, saponification ( $n / (n+m)$ ): > 96.0 mol%.

## Scheme S2

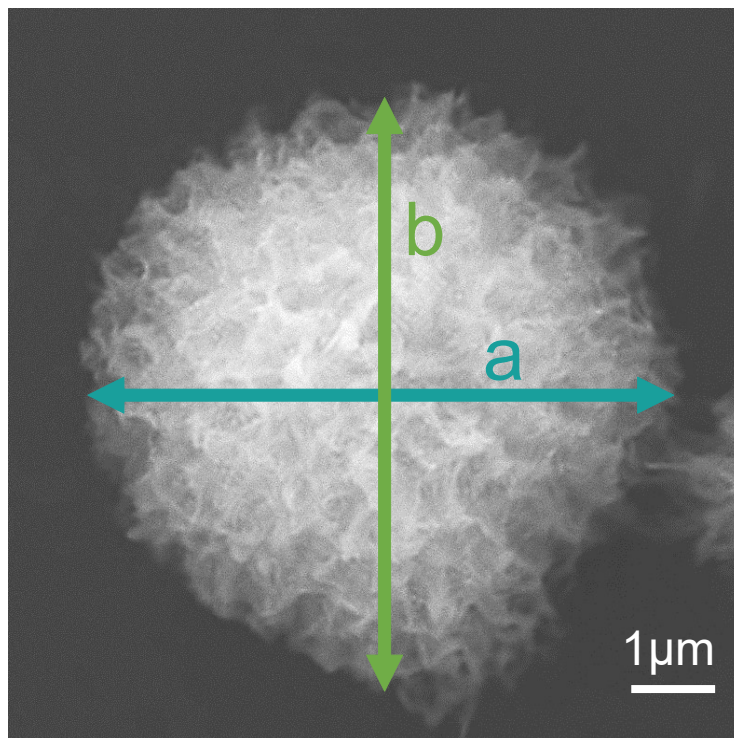

**Scheme S2.** Illustration for the calculation of the particle size. The diameter of a particle is equal to the average size between a and b. Two hundred particles were selected from each film and the average particle size was calculated.

**Figure S1**

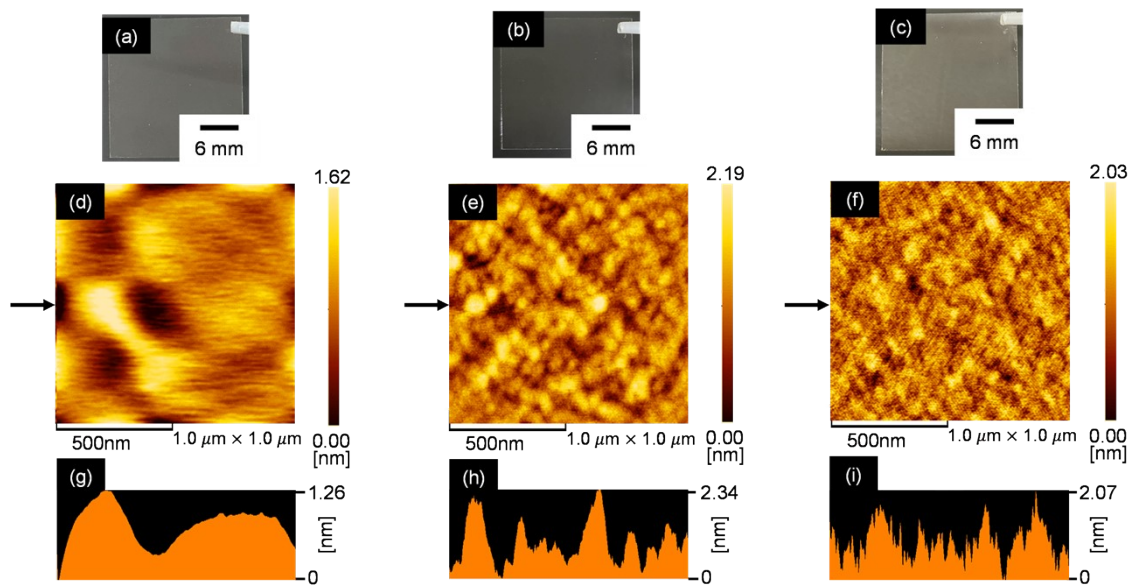

**Figure S1.** Representative (a~c) photographs, (d~f) AFM topographic images of (a, d) PVA, (b, e) PVA-CA, and (c, f) PVA/18CA films, where (g~i) the height profiles of the cross sections taken along with the direction of black arrows for (d~f) were shown.

**Figure S2**

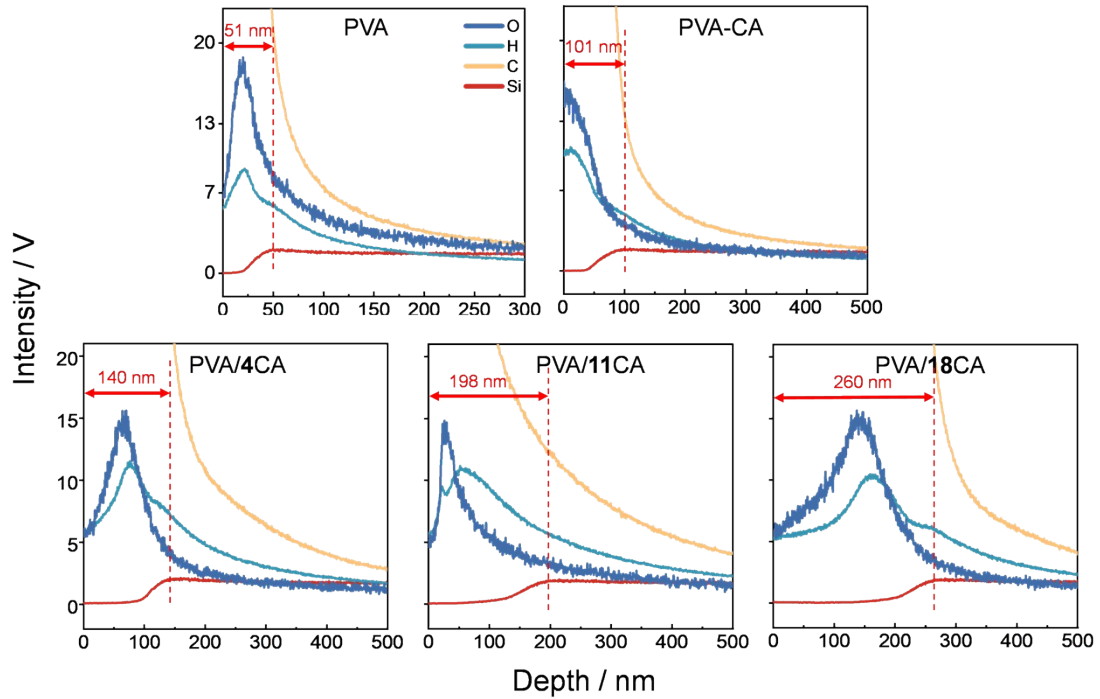

**Figure S2.** Depth profiles of PVA, PVA-CA, PVA/4CA, PVA/11CA and PVA/18CA films.

The depth profiling of the elements (O, H, Si, C) was characterized using a glow discharge optical emission spectrometry (GD-OES; GD-Profilier2, HORIBA Ltd.), where the samples were used as a cathode in a direct current plasma.

**Figure S3**

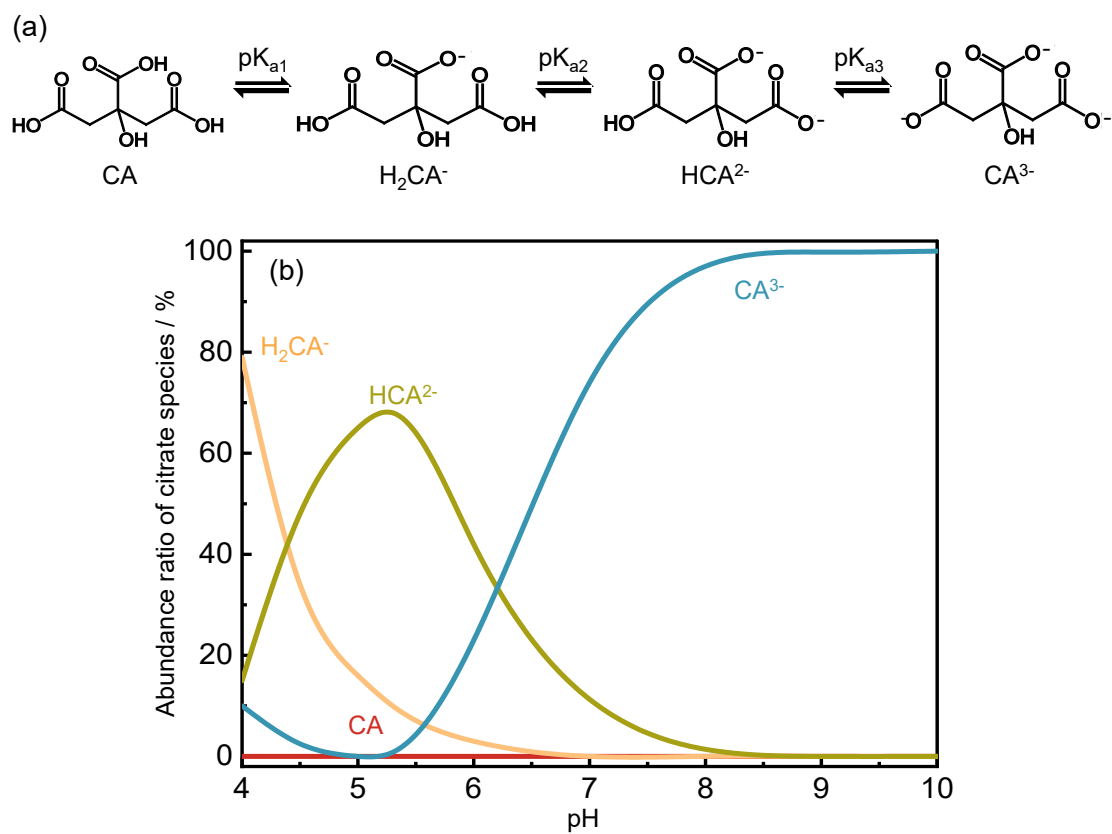

**Figure S3.** (a) Illustration of the dissociation state changes of CA with the pKa values of 3.1, 4.7 and 6.4, respectively. (b) Abundance ratios of CA species at different pH values.

### Scheme S3

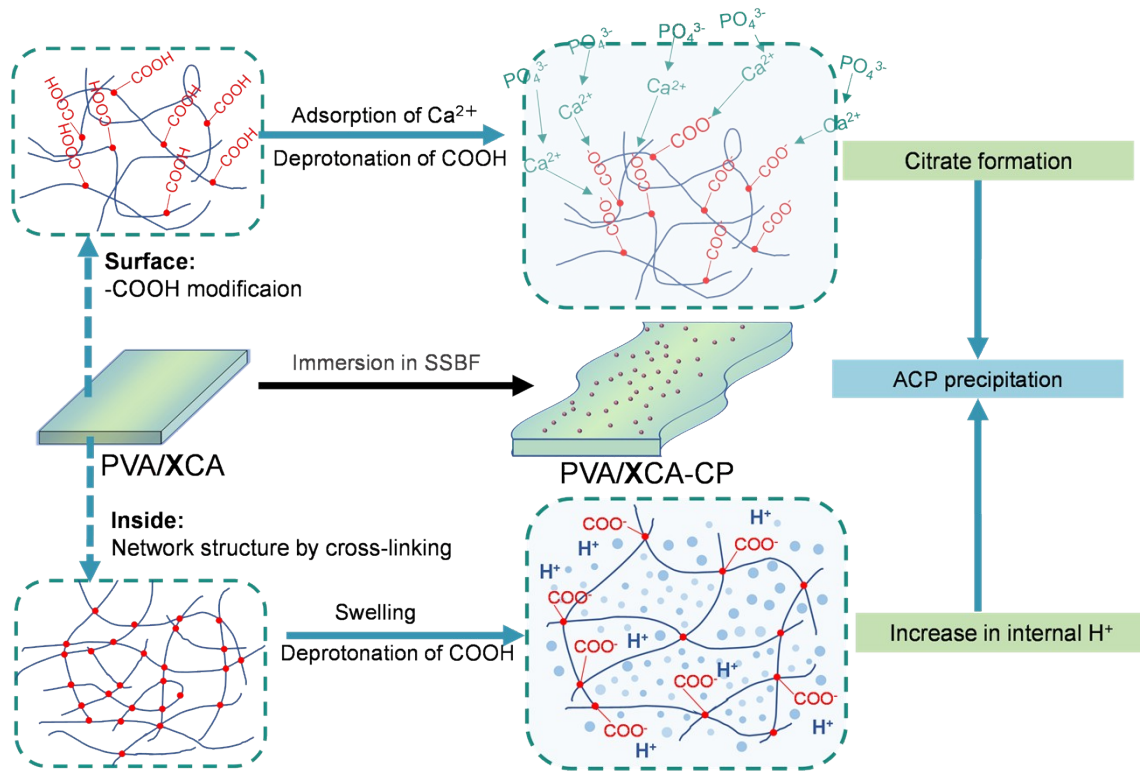

**Scheme S3.** Illustration of the mechanism of ACP precipitation on PVA/CA films.

**Figure S4**

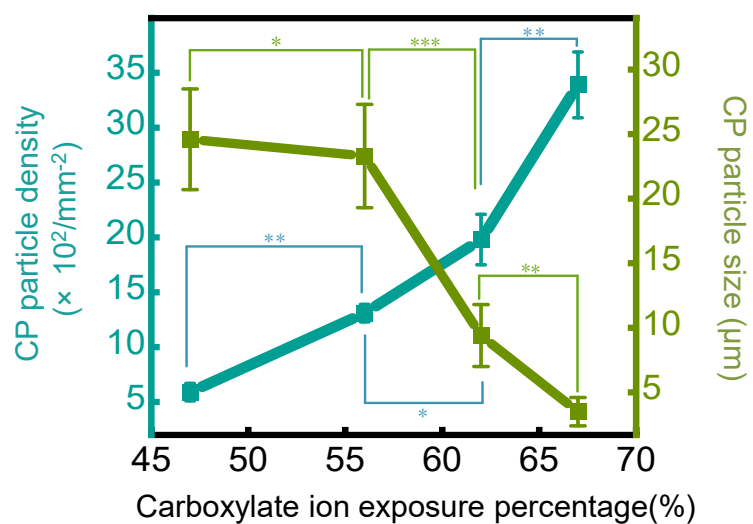

**Figure S4.** The densities and sizes of the precipitated CP particles with changing the carboxylate ion exposure percentages. The student's *t*-test results were represented as  $p > 0.10$  (n.s.),  $p < 0.10$  (\*),  $p < 0.05$  (\*\*) and  $p < 0.01$  (\*\*\*).
